# Supplementary material for: Dual roles of endogenous and exogenous galectin-1 in the control of testicular immunopathology
Source: PubMed Central journal article supplement (PMC4519738; doi:10.1038/srep12259), 2015-07-30
Supplement: srep12259-s1.pdf [file srep12259-s1.pdf]

# Dual roles of endogenous and exogenous galectin-1 in the control of testicular immunopathology

Cecilia V. Pérez<sup>1</sup>, Leticia G. Gómez<sup>1</sup>, Gisela S. Gualdoni<sup>1</sup>, Livia Lustig<sup>1</sup>, Gabriel A. Rabinovich<sup>2,3</sup>, and Vanesa A. Guazzone<sup>1\*</sup>

## Supplementary Fig. S1 online

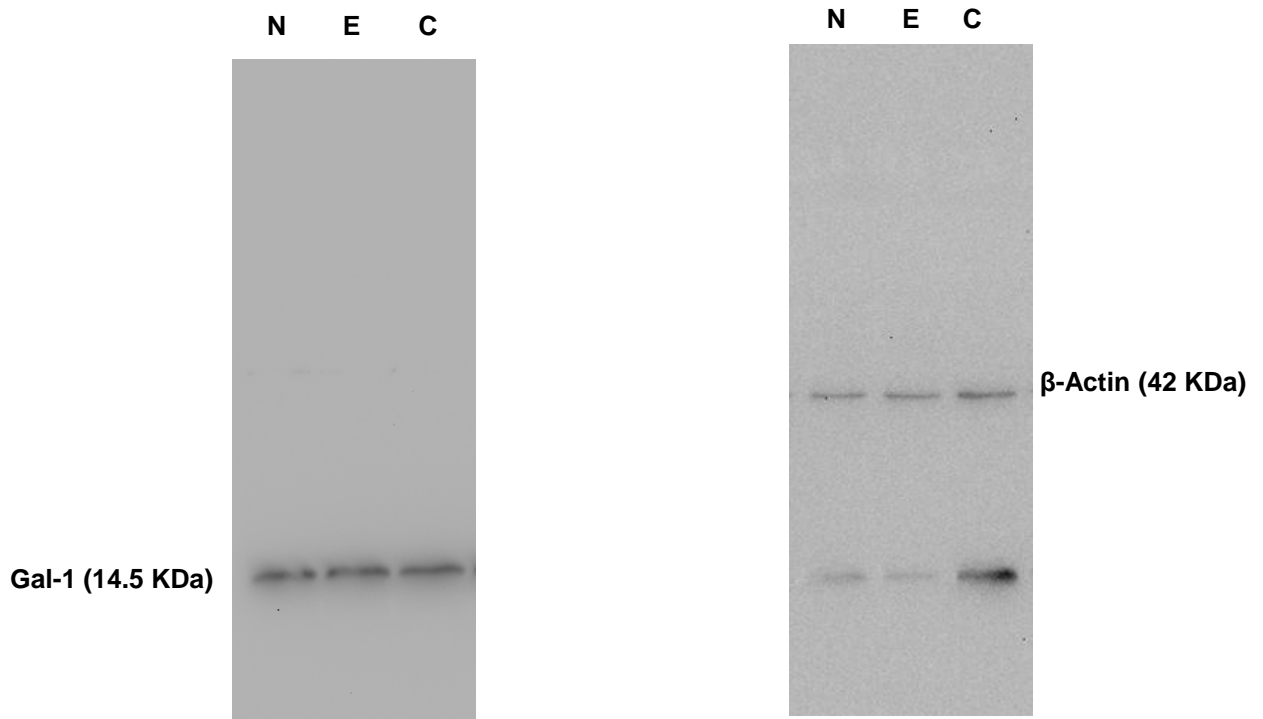

## Supplementary Fig. S2 online

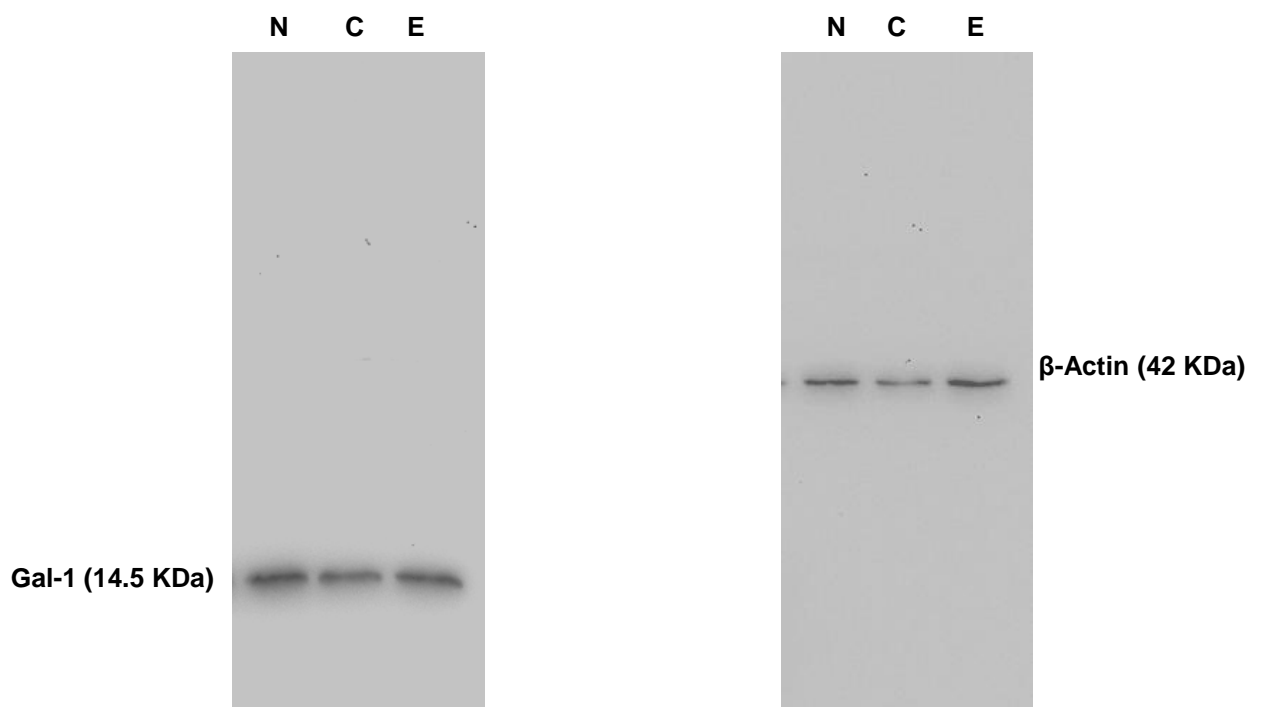

## Supplementary Fig. S3 online

### Quantification of testicular blood vessels

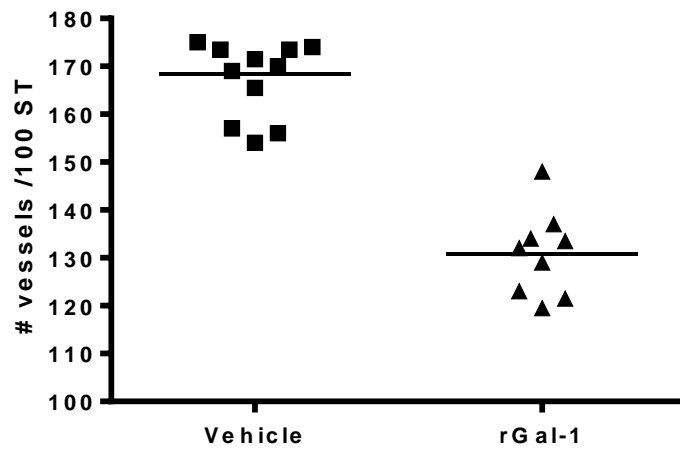

Quantification of blood vessel in testis of mice immunized with testicular homogenate and adjuvants and injected with saline solution (vehicle) or recombinant-Galectin-1 (rGal-1). ST: seminiferous tubules
